# Supplementary material
Source: Springer Nature journal article supplement (https://www.springermedizin.de/resource/supplementary/12890_2013_504_MOESM1_ESM.pdf/9505616)

## Identification

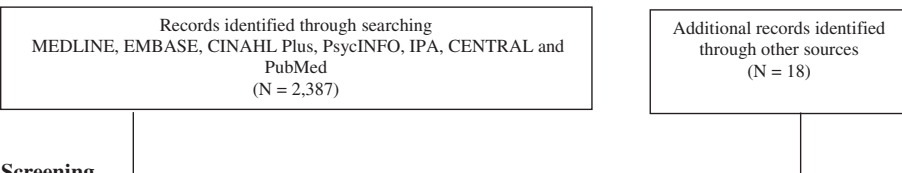

## Screening

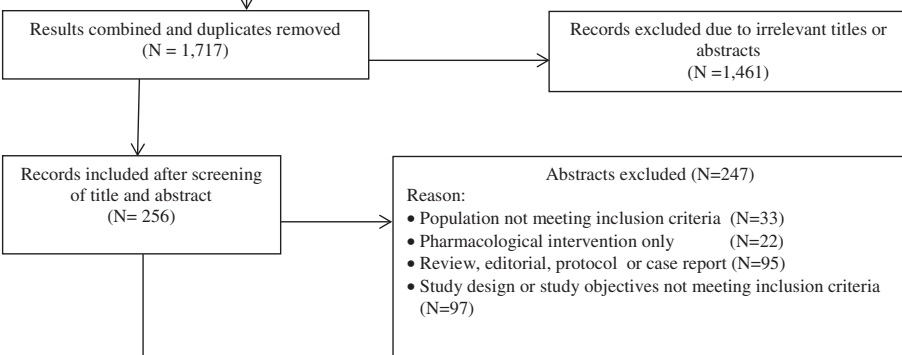

## Eligibility

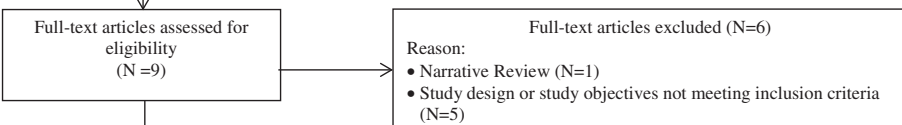

## Included

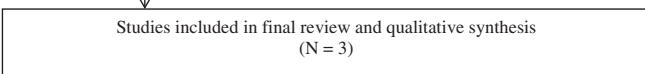

Supplement: MOESM1 [file 9505616]
